# Supplementary material for: Vessels Disturb Bottlenose Dolphin Behavior and Movement in an Active Ship Channel
Source: MDPI journal article supplement (doi:10.3390/ani13223441), 2023-11-08
Supplement: s1 [file s1]

## Supplemental Materials

**Table S1. Days (n = 63) and hours (n = 287.8) of observation of bottlenose dolphins in CCSC-Aransas Pass, Texas per month from June 2021 to September 2022.**

| Season | Month     | Days/Month | Hours | Mean hours/day ( $\pm$ SD) |
|--------|-----------|------------|-------|----------------------------|
| Summer | June      | 7          | 28.9  | 4.1 $\pm$ (1.4)            |
|        | July      | 10         | 47.2  | 4.7 $\pm$ (1.6)            |
|        | August    | 12         | 48.5  | 4.0 $\pm$ (1.5)            |
| Fall   | September | 6          | 27.3  | 4.6 $\pm$ (0.9)            |
|        | October   | 3          | 14.2  | 4.7 $\pm$ (0.3)            |
|        | November  | 5          | 20.2  | 4.0 $\pm$ (0.9)            |
| Winter | December  | 5          | 21.2  | 4.2 $\pm$ (0.9)            |
|        | January   | 2          | 9.1   | 4.6 $\pm$ (1.0)            |
|        | February  | 2          | 10.4  | 5.2 $\pm$ (0.7)            |
| Spring | March     | 2          | 8.9   | 4.4 $\pm$ (1.0)            |
|        | April     | 2          | 11.5  | 5.7 $\pm$ (1.2)            |
|        | May       | 7          | 40.4  | 5.8 $\pm$ (0.4)            |

**Table S2. Contingency table from the multiple logistic regression model of observed (top) and expected (middle) counts of each behavioral state across season (n = 4,339 tracks) with chi-square value (bottom). Star (\*) indicates a chi-square value above model chi-square of 16.92.**

| Contingency Table |        | Season  |          |          |          | Total |
|-------------------|--------|---------|----------|----------|----------|-------|
|                   |        | Summer  | Fall     | Spring   | Winter   |       |
| Behavior          | Travel | 564     | 302      | 174      | 87       | 1127  |
|                   |        | 485.19  | 260.52   | 247.27   | 134.02   |       |
|                   |        | 12.80   | 6.61     | 21.71*   | 16.50    |       |
|                   | Forage | 679     | 424      | 420      | 346      | 1869  |
|                   |        | 804.63  | 432.04   | 410.07   | 222.26   |       |
|                   |        | 19.62*  | 0.15     | 0.24     | 68.88*   |       |
|                   | Mill   | 399     | 104      | 111      | 46       | 660   |
|                   |        | 284.14  | 152.57   | 144.81   | 78.49    |       |
|                   |        | 46.43*  | 15.46    | 7.89     | 13.45    |       |
|                   | Social | 226     | 173      | 247      | 37       | 683   |
|                   |        | 294.041 | 157.8818 | 149.8539 | 81.22332 |       |
|                   |        | 15.74   | 1.45     | 62.98*   | 24.08*   |       |
|                   | Total  | 1868    | 1003     | 952      | 516      | 4339  |

**Table S3.** Contingency table from the multiple logistic regression R model of observed (top) and expected (middle) counts of each behavioral state across time of day (n = 4,339 tracks) with chi-square value (bottom). Star (\*) indicates a chi-square value above model chi-square of 16.92.

| Contingency Table |        | Time of Day |                 |                |         | Total |
|-------------------|--------|-------------|-----------------|----------------|---------|-------|
|                   |        | Mid-Day     | Early Afternoon | Late Afternoon | Morning |       |
| Behavior          | Travel | 426         | 492             | 52             | 157     | 1127  |
|                   |        | 420.00      | 392.72          | 106.75         | 207.53  |       |
|                   |        | 0.09        | 25.10*          | 28.08*         | 12.30   |       |
|                   | Forage | 672         | 530             | 239            | 428     | 1869  |
|                   |        | 696.51      | 651.29          | 177.09         | 344.27  |       |
|                   |        | 0.86        | 22.59*          | 21.64*         | 20.36*  |       |
|                   | Mill   | 281         | 198             | 55             | 126     | 660   |
|                   |        | 245.96      | 229.99          | 62.52          | 121.53  |       |
|                   |        | 4.99        | 4.45            | 0.90           | 0.16    |       |
|                   | Social | 238         | 292             | 65             | 88      | 683   |
|                   |        | 254.53      | 238.00          | 64.69532       | 125.77  |       |
|                   |        | 1.07        | 12.25           | 0.001          | 11.34   |       |
|                   | Total  | 1617        | 1512            | 411            | 799     | 4339  |

**Table S4.** Contingency table from the multiple logistic regression model of observed (top) and expected (middle) counts of each behavioral state across vessel type (n = 4,339 tracks) with chi-square value (bottom).

| Contingency Table |                     | Behavior |        |        |        | Total |
|-------------------|---------------------|----------|--------|--------|--------|-------|
|                   |                     | Travel   | Forage | Mill   | Social |       |
| Vessel Type       | None                | 295      | 363    | 98     | 127    | 883   |
|                   |                     | 229.35   | 380.35 | 134.31 | 138.99 |       |
|                   |                     | 18.79    | 0.79   | 9.82   | 1.035  |       |
|                   | Coastal Cargo       | 33.00    | 29.00  | 30.00  | 12.00  | 104   |
|                   |                     | 27.01    | 44.80  | 15.82  | 16.37  |       |
|                   |                     | 1.33     | 5.57   | 12.71  | 1.17   |       |
|                   | Ecotour             | 56.00    | 52.00  | 42.00  | 49.00  | 199   |
|                   |                     | 51.69    | 85.72  | 30.27  | 31.32  |       |
|                   |                     | 0.36     | 13.26  | 4.55   | 9.97   |       |
|                   | Ferry               | 37       | 119    | 7      | 5      | 168   |
|                   |                     | 43.64    | 72.37  | 25.55  | 26.44  |       |
|                   |                     | 1.01     | 30.05  | 13.47  | 17.39  |       |
|                   | Fishing             | 33       | 69     | 17     | 16     | 135   |
|                   |                     | 35.06    | 58.15  | 20.53  | 21.25  |       |
|                   |                     | 0.12     | 2.02   | 0.61   | 1.30   |       |
|                   | Mixed               | 354      | 777    | 280    | 274    | 1685  |
|                   |                     | 437.66   | 725.80 | 256.30 | 265.24 |       |
|                   |                     | 15.99    | 3.61   | 2.19   | 0.29   |       |
|                   | Offshore Commercial | 19       | 24     | 8      | 5      | 56    |
|                   |                     | 14.54    | 24.12  | 8.52   | 8.81   |       |
|                   |                     | 1.36     | 0.001  | 0.032  | 1.65   |       |
|                   | Personal            | 279      | 401    | 170    | 175    | 1025  |

|  |             |                |                |                |                |      |
|--|-------------|----------------|----------------|----------------|----------------|------|
|  | Enforcement | 266.23<br>0.61 | 441.51<br>3.72 | 155.91<br>1.27 | 161.34<br>1.16 | 33   |
|  |             | 3              | 19             | 3              | 8              |      |
|  |             | 8.57<br>3.62   | 14.21<br>1.61  | 5.02<br>0.81   | 5.19<br>1.52   |      |
|  | Supply      | 9              | 7              | 4              | 10             | 30   |
|  |             | 7.79           | 12.92          | 4.56           | 4.72           |      |
|  |             | 0.19           | 2.71           | 0.07           | 5.89           |      |
|  | Tug         | 9              | 9              | 1              | 2              | 21   |
|  |             | 5.45           | 9.05           | 3.19           | 3.31           |      |
|  |             | 2.30           | 0.0002         | 1.51           | 0.52           |      |
|  | Total       | 1127           | 1869           | 660            | 683            | 4339 |

**Table S5.** Contingency table from the multiple logistic regression model of observed (top) and expected (middle) counts of each behavioral state across vessel size (n = 4,339 tracks) with chi-square value (bottom).

| Contingency Table |        | Vessel Size |             |       |        |       |       | Total |
|-------------------|--------|-------------|-------------|-------|--------|-------|-------|-------|
|                   |        | None        | Extra Large | Large | Medium | Mixed | Small |       |
| Behavior          | Travel | 295         | 27          | 19    | 62     | 358   | 366   | 1127  |
|                   |        | 229.3       | 22.3        | 18.4  | 64.2   | 423.1 | 369.6 |       |
|                   |        | 18.8        | 1.0         | 0.0   | 0.1    | 10.0  | 0.0   |       |
|                   | Forage | 363         | 34          | 39    | 107    | 785   | 541   | 1869  |
|                   |        | 380.3       | 37.0        | 30.6  | 106.4  | 701.7 | 612.9 |       |
|                   |        | 0.8         | 0.3         | 2.3   | 0.0    | 9.9   | 8.4   |       |
|                   | Mill   | 98          | 17          | 5     | 45     | 240   | 255   | 660   |
|                   |        | 134.3       | 13.1        | 10.8  | 37.6   | 247.8 | 216.5 |       |
|                   |        | 9.8         | 1.2         | 3.1   | 1.5    | 0.2   | 6.9   |       |
|                   | Social | 127         | 8           | 8     | 33     | 246   | 261   | 683   |
|                   |        | 139.0       | 13.5        | 11.2  | 38.9   | 256.4 | 224.0 |       |
|                   |        | 1.0         | 2.3         | 0.9   | 0.9    | 0.4   | 6.1   |       |
|                   | Total  | 883         | 86          | 71    | 247    | 1629  | 1423  | 4339  |
